# Supplementary material
Source: Springer Nature journal article supplement (https://www.springermedizin.de/resource/supplementary/12906_2006_107_MOESM2_ESM.pdf/9524032)

**GPT Level (IU/L)**

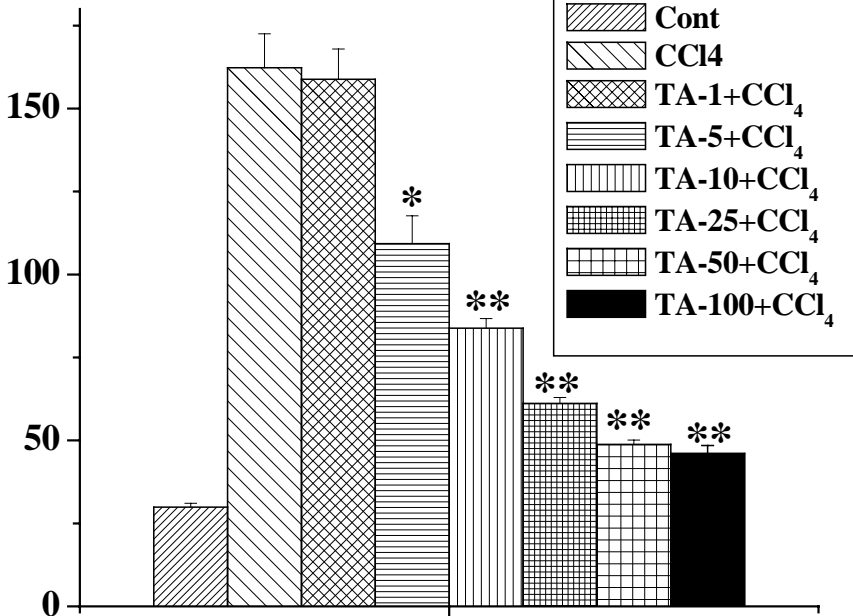

Supplement: MOESM2 [file 9524032]
